# Supplementary material
Source: PubMed Central journal article supplement (PMC3778426)
Supplement: cn4000428_si_001.pdf [file cn4000428_si_001.pdf]

## **Supplemental Information**

### **Synthesis, Modeling and Pharmacological Evaluation of UMB 425, a Mixed $\mu$ Agonist/ $\delta$ Antagonist Opioid Analgesic with Reduced Tolerance Liabilities**

Jason R. Healy<sup>a</sup>, Padmavani Bezawada<sup>b</sup>, Jihyun Shim<sup>b</sup>, Jace W. Jones<sup>b</sup>, Maureen A. Kane<sup>b</sup>, Alexander D. MacKerell Jr.<sup>b</sup>, Andrew Coop<sup>b\*</sup>, and Rae R. Matsumoto<sup>a\*</sup>

<sup>a</sup>Department of Basic Pharmaceutical Sciences, West Virginia University, Morgantown, West Virginia 26506, United States

<sup>b</sup>Department of Pharmaceutical Sciences, University of Maryland School of Pharmacy, Baltimore, Maryland 21201, United States

#### **CORRESPONDING AUTHOR FOOTNOTE**

Rae R. Matsumoto, West Virginia University Department of Basic Pharmaceutical Sciences, School of Pharmacy, 1 Medical Center Dr., P.O. Box 9500, Morgantown, West Virginia 26506, Tel: 1-304-293-1450. Fax: 1-304-293-2576; Email: rmatsumoto@hsc.wvu.edu.

Andrew Coop, University of Maryland, Department of Pharmaceutical Sciences, School of Pharmacy, 20 Penn St., Baltimore, Maryland, 21201, Tel: 1-410-706-2029; Fax: 1-410-706-4012; Email: acoop@rx.umaryland.edu.

**KEYWORDS:** Antinociception, conformationally sampled pharmacophore, delta antagonist, mu agonist, opioid receptor, tolerance

#### **TABLE OF CONTENTS**

1. S1. Compounds included in the  $\delta$  receptor CSP training set
2. Spectroscopic and Chromatographic Methods
3. S2. High resolution mass spectrum for UMB 425
4. S3. HPLC chromatogram for UMB 425

**Figure S1**

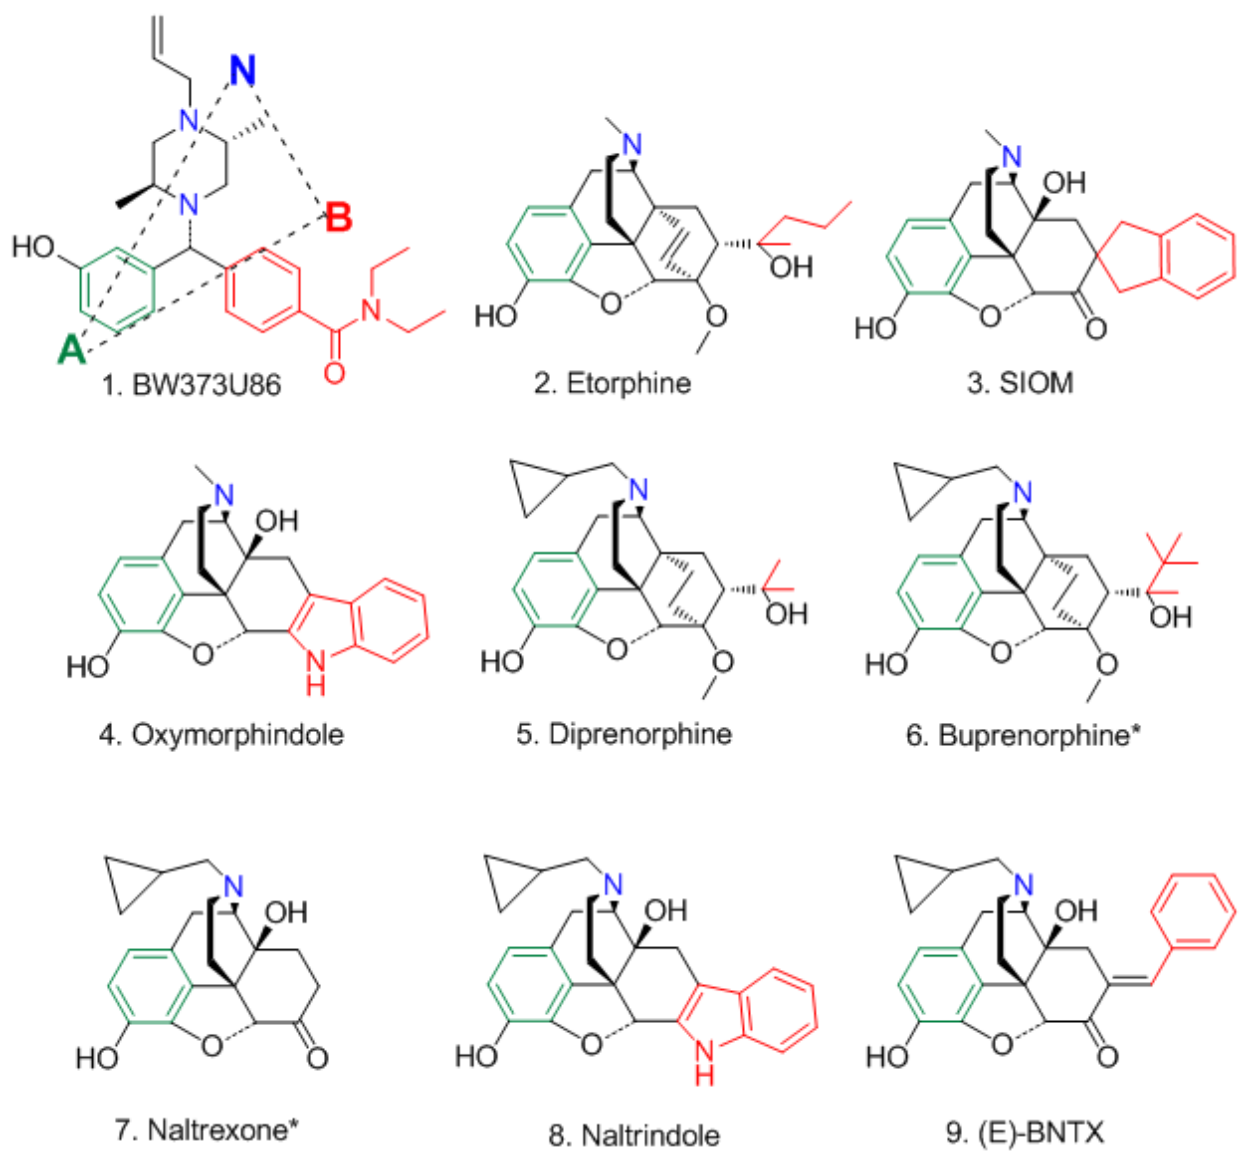

**Figure S1.** Compounds included in the  $\delta$  receptor CSP training set. Pharmacophoric descriptors are designated in colors where green represents an aromatic ring (A), blue a basic nitrogen (N) and red a hydrophobic group (B).

## SPECTROSCOPIC AND CHROMATOGRAPHIC METHODS

**Chemicals and Materials.** LC-MS grade acetonitrile, water, ammonium acetate and formic acid were purchased from Fisher Scientific (New Jersey, NJ).

**High Resolution Mass Spectrometry (HRMS).** Samples were prepared to an approximate concentration of 1  $\mu\text{M}$  in water:acetonitrile (1:1) with 0.1% formic acid. Samples were analyzed by electrospray ionization in positive ion mode on a bench top quadrupole orbitrap mass spectrometer (Q Exactive; Thermo Fisher Scientific, Bremen, Germany). Samples were infused at a rate of 5.0  $\mu\text{L}/\text{min}$ . Instrument calibration ( $< 1$  ppm) and tuning parameters were optimized using the manufacturer's calibration mixture (consisting of caffeine, the tetrapeptide MRFA and Ultramark 1621). The ion source was set to 3.5 kV at a capillary temperature of 320  $^{\circ}\text{C}$ . All spectra were acquired over a time period of 1 min and averaged. Data were acquired and processed using Xcalibur, Version 2.2 (Thermo Fisher Scientific).

**Liquid Chromatography for Sample Purity.** Samples were prepared to an approximate concentration of 1  $\mu\text{M}$  in water:acetonitrile (1:1). Samples were analyzed by high performance liquid chromatography (HPLC) equipped with a photo-diode array detector (Acquity UPLC H-Class, Waters, Milford, MA). The liquid chromatography separation was performed on a Develosil C18 column (2.0 x 150 mm, 5  $\mu\text{M}$ ) (Phenomenex, Torrance, CA) operated at 30  $^{\circ}\text{C}$ . Solvent A consisted of 0.1% formic acid and 10 mM ammonium acetate in water. Solvent B consisted of 0.1% formic acid in acetonitrile. The gradient program was 0.0-2.0 min, 1.0% B; 2.0-5.0 min, gradient to 50% B; 5.0-8.0 min, 50% B; 8.0-10.0 min, gradient to 95% B; 10.0-12.0 min, 95% B; 12.0-12.5 min, gradient to 1.0% B; 12.5-15.0 min, 1.0% B. The flow rate was to 0.5 mL/min during all separation steps and injection volume was 10  $\mu\text{L}$ . Detection was performed using a photo-diode array (PDA) detector scanned over the following wavelength (210-400 nm) at a 4.8 nm resolution. Data collection and analysis was performed by Empower Pro 3 (Waters, Milford, MA).

## Figure S2

AC\_001\_100X\_pos\_140K\_041213\_001 #9-102 RT: 0.08-0.89 AV: 94 NL: 7.62E8  
T: FTMS + p E SI Full ms [200.00-500.00]

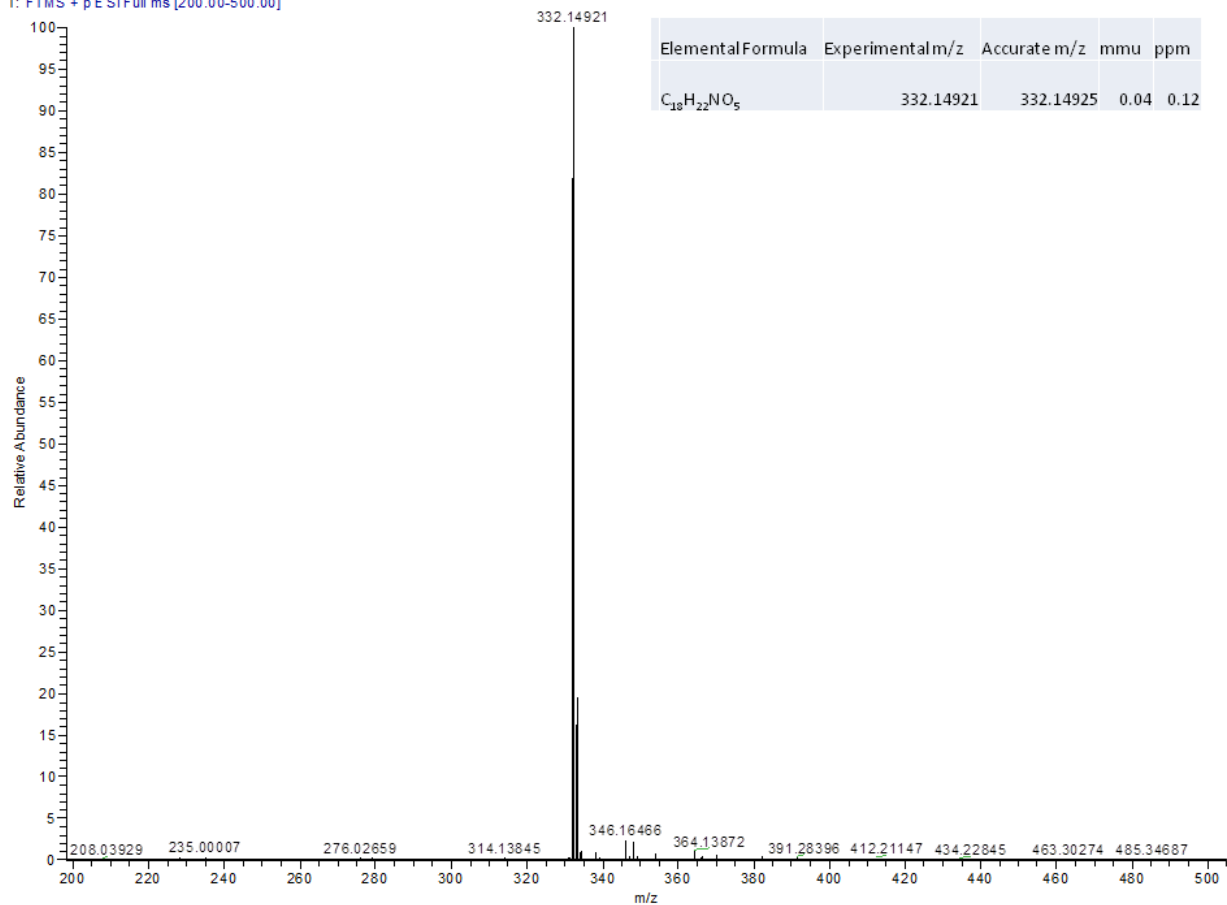

**Figure S2.** High resolution mass spectrum for UMB 425. The HRMS experiment yielded a measured experimental  $m/z$  value of 332.14921 for UMB 425 resulting in a mass accuracy of 0.04 milli mass units (mmu) which uniquely identified UMB 425 to have the elemental formula of C<sub>18</sub>H<sub>22</sub>NO<sub>5</sub>.

**Figure S3**

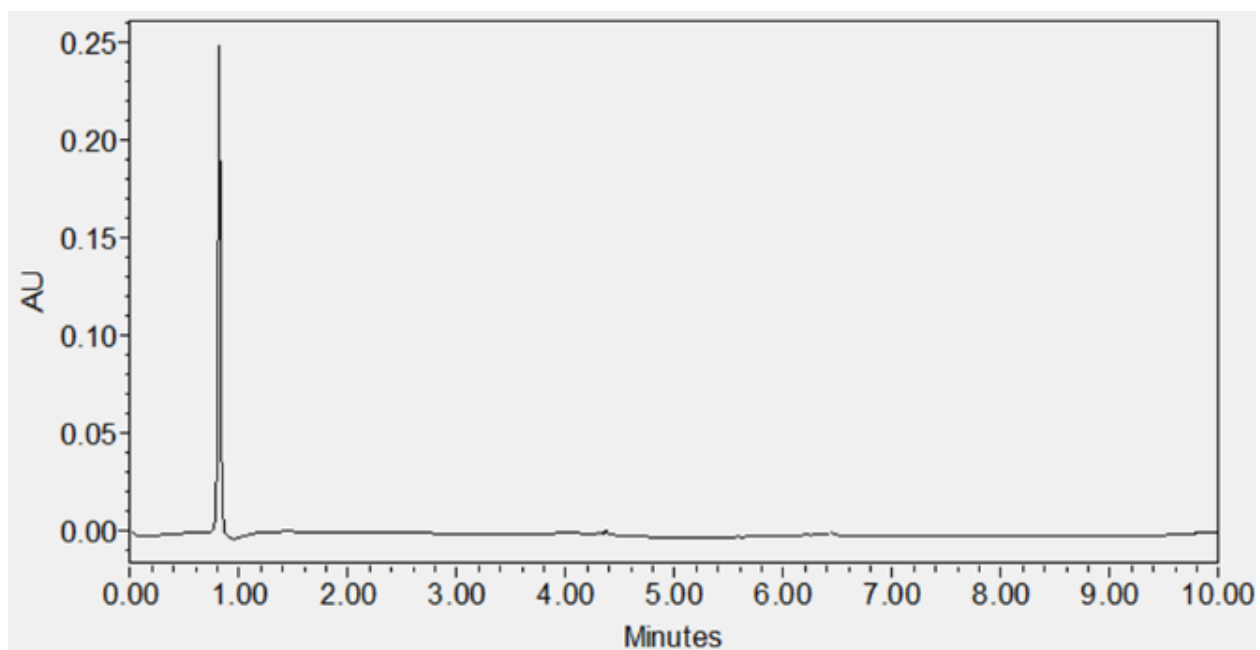

**Figure S3.** HPLC chromatogram for UMB 425. Sample purity for UMB 425 was assessed using HPLC coupled to a PDA detector. The HPLC separation yielded a liquid chromatogram with only one peak at retention time 0.8 min using a C18 reverse phase column. This separation effectively demonstrated the sample purity for UMB 425 was greater than 95%.
